# Supplementary material for: Reducing Smad3/ATF4 was essential for Sirt1 inhibiting ER stress-induced apoptosis in mice brown adipose tissue
Source: PubMed Central journal article supplement (PMC5354730; doi:10.18632/oncotarget.14035), 2016-12-20
Supplement: oncotarget-08-9267-s001.pdf [file oncotarget-08-9267-s001.pdf]

## Reducing Smad3/ATF4 was essential for Sirt1 inhibiting ER stress-induced apoptosis in mice brown adipose tissue

### Supplementary Materials

**Supplementary Table S1: Primer sequences for real-time PCR**

| Gene             | RT-PCR primers (5'-3')                                                            |
|------------------|-----------------------------------------------------------------------------------|
| <i>Sirt1</i>     | F <sup>a</sup> : TCAGTGTTCATGGTTCCTTTGC<br>R <sup>b</sup> : AATCTGCTCCTTTGCCACTCT |
| <i>Sirt2</i>     | F: AATACCCGCTAAGCTGGATGA<br>R: TGCATACAGGAGAAGAAACGC                              |
| <i>Sirt3</i>     | F:CTGGATGGACAGGACAGATAAG<br>R:TCTTGCTGGACATAGGATGATC                              |
| <i>UCP1</i>      | F: ACTGCCACACCTCCAGTCATT<br>R:CTTTGCCTCACTCAGGATTGG                               |
| <i>PRDM16</i>    | F: AGCCCTCGCCCAACTTGC<br>R: TGACCCCGGGCTTCGGTTCA                                  |
| <i>PGC1-α</i>    | F: CATGGATGGCCTATTTGATGAC<br>R: CACGGAGAGTTAAAGGAAGAGC                            |
| <i>Cidea</i>     | F:TGCTCTTCTGTATCGCCAGT<br>R:GCCGTGTTAAGGAATCTGCTG                                 |
| <i>GRP78</i>     | F: ACCTATTCCTGCGTCGGTGT<br>R: GCATCGAAGACCGTGTCTC                                 |
| <i>Chop</i>      | F: GACGCTTCACTACTCTTGACCCTGCG<br>R: GGATGTGCGTGTGACCTCTGT                         |
| <i>ATF4</i>      | F:CCTAGGTCTCTTAGATGACTATCTGGAGG<br>R:CCAGGTCATCCATTCGAAACAGAGCATCG                |
| <i>ATF6</i>      | F:TACCACCCACAACAAGACCA<br>R:TGATGATCCCGGAGATAAGG                                  |
| <i>Caspase3</i>  | F:GGCTTGCCAGAAGATAACCGGT<br>R:GCATAAATTCTAGCTTGTGCGCGT                            |
| <i>Caspase12</i> | F:CTCTAACTGTCCGAGTCTGAGAAACA<br>R:TCAGCAGTGGATATCCCTTTG                           |
| <i>Bcl-2</i>     | F:CTGGTGGACAACATCGCTCTG<br>R:GGTCTGCTGACCTCACTTGTG                                |
| <i>Bax</i>       | F:TGGTTGCCCTTTTCTACTTTG<br>R:GAAGTAGGAAAGGAGGCCATC                                |
| <i>Smad3</i>     | F:ACCATCCCCAGGTCCCTGGATGGCC<br>R:AACTCGGCCGGGATCTCTGTGTGGCGT                      |
| <i>Smad5</i>     | F:CAACACAGCCTTCTGGTTCA<br>R:TTGACAACAAACCCAAGCAG                                  |
| <i>β-actin</i>   | F: ACTGCCGCATCCTCTTCCTC<br>R: CTCCTGCTTGCTGATCCACATC                              |

F<sup>a</sup>: Forward primer

R<sup>b</sup>: Reverse primer
